# Supplementary material for: Proximal muscle rehabilitation is effective for patellofemoral pain: a systematic review with meta-analysis
Source: HighWire-hosted journal article supplement (doi:10.1136/bjsports-2015-094723), 2015-07-14
Supplement: bjsports-2015-094723supp3.pdf [file bjsports-2015-094723supp3.pdf]

Supplementary File 3 – Proximal rehabilitation compared to quadriceps rehabilitation group study characteristics

| <i>Author</i>                                                     | <i>Intervention</i>                                                                                                                                                                                                                                                                                                                                                                                                                                                                                                                                                                                                                                                                                                                                                                                                                                                                                  | <i>Control</i>                                                                                                                                                                                                                                                                                                                                                                                                                                                                                                                                                                                                                                                                                                                                                                                                                                                                                                                                                                                                                                                                                                                                                                             | <i>Variables measured</i>                                                                                                                                                                                                                                                                                                                                                                                 | <i>Follow up</i> |
|-------------------------------------------------------------------|------------------------------------------------------------------------------------------------------------------------------------------------------------------------------------------------------------------------------------------------------------------------------------------------------------------------------------------------------------------------------------------------------------------------------------------------------------------------------------------------------------------------------------------------------------------------------------------------------------------------------------------------------------------------------------------------------------------------------------------------------------------------------------------------------------------------------------------------------------------------------------------------------|--------------------------------------------------------------------------------------------------------------------------------------------------------------------------------------------------------------------------------------------------------------------------------------------------------------------------------------------------------------------------------------------------------------------------------------------------------------------------------------------------------------------------------------------------------------------------------------------------------------------------------------------------------------------------------------------------------------------------------------------------------------------------------------------------------------------------------------------------------------------------------------------------------------------------------------------------------------------------------------------------------------------------------------------------------------------------------------------------------------------------------------------------------------------------------------------|-----------------------------------------------------------------------------------------------------------------------------------------------------------------------------------------------------------------------------------------------------------------------------------------------------------------------------------------------------------------------------------------------------------|------------------|
| <b><i>Proximal rehabilitation v Quadriceps rehabilitation</i></b> |                                                                                                                                                                                                                                                                                                                                                                                                                                                                                                                                                                                                                                                                                                                                                                                                                                                                                                      |                                                                                                                                                                                                                                                                                                                                                                                                                                                                                                                                                                                                                                                                                                                                                                                                                                                                                                                                                                                                                                                                                                                                                                                            |                                                                                                                                                                                                                                                                                                                                                                                                           |                  |
| Ferber et al. <sup>42</sup>                                       | <p>Proximal and core focused exercises (n= 111)</p> <ul style="list-style-type: none"> <li>• Performed 6xper week (3x per with trainer)</li> <li>• 6 week intervention period</li> </ul> <p>Week 1</p> <ul style="list-style-type: none"> <li>• Proximal abduction – standing; Proximal external rotator – standing; Proximal external rotator – sitting; All 3x10repetitionss (resistance band)</li> </ul> <p>Week 2</p> <ul style="list-style-type: none"> <li>• Proximal abduction – standing; Proximal external rotator – standing; Proximal internal rotator – standing; All 3x10reps (resistance band)</li> </ul> <p>Week 3</p> <ul style="list-style-type: none"> <li>• Proximal abduction – standing; Proximal external rotator – standing; Proximal external rotator – sitting; All 3x10reps (stronger resistance band)</li> <li>• Balancing 2 feet on Airex® pad 3x30-45seconds</li> </ul> | <p>Quadriceps exercise (n= 88)</p> <ul style="list-style-type: none"> <li>• Performed 6xper week (3x per with trainer)</li> <li>• 6 week intervention period</li> </ul> <p>Week 1</p> <ul style="list-style-type: none"> <li>• Isometric quadriceps setting Knee extensions—standing Double-legged, one-quarter squats; 3x10 repetitions</li> </ul> <p>Week 2</p> <ul style="list-style-type: none"> <li>• Isometric quadriceps setting; Double-legged, one-half squats; Terminal knee extension w/ resistance band; 3x15 repetitions; Double-legged, one-quarter squats ; 3x30seconds</li> </ul> <p>Week 3</p> <ul style="list-style-type: none"> <li>• Double-legged, one-half squats ; Single-legged, one-quarter squat; Double-legged, one-quarter wall squats; 3x10 repetitions;</li> <li>• Terminal-knee extension w/ resistance band 3x10 repetitions with stronger band</li> </ul> <p>Week 4</p> <ul style="list-style-type: none"> <li>• Single-legged, one-half squats ; Forward, one-quarter lunge; Lateral step-down (4-inch [3.6 cm] step), No.; Forward step-down (4-inch [3.6 cm] step), No. ; 3x10 repetitions;</li> <li>• Double-legged, one-half wall squats;</li> </ul> | <ul style="list-style-type: none"> <li>• Pain</li> <li>• VAS</li> <li>• Function <ul style="list-style-type: none"> <li>• Anterior knee pain score</li> </ul> </li> <li>• Strength <ul style="list-style-type: none"> <li>• Proximal abduction</li> <li>• Proximal extension</li> <li>• Proximal internal rotation</li> <li>• Proximal external rotation</li> <li>• Knee extension</li> </ul> </li> </ul> | 6 weeks          |

|                            |                                                                                                                                                                                                                                                                                                                                                                                                                                                                                                                                                                                                                                                                                                                        |                                                                                                                                                                                                                                                                                                                                                                                                                                                                                                                                                                                                                                                         |                                                                                                                                                                                                                                                                                        |         |
|----------------------------|------------------------------------------------------------------------------------------------------------------------------------------------------------------------------------------------------------------------------------------------------------------------------------------------------------------------------------------------------------------------------------------------------------------------------------------------------------------------------------------------------------------------------------------------------------------------------------------------------------------------------------------------------------------------------------------------------------------------|---------------------------------------------------------------------------------------------------------------------------------------------------------------------------------------------------------------------------------------------------------------------------------------------------------------------------------------------------------------------------------------------------------------------------------------------------------------------------------------------------------------------------------------------------------------------------------------------------------------------------------------------------------|----------------------------------------------------------------------------------------------------------------------------------------------------------------------------------------------------------------------------------------------------------------------------------------|---------|
|                            | <p>Week 4-6</p> <ul style="list-style-type: none"> <li>• Proximal extension 45° – standing; Proximal external rotator – standing; Proximal external rotator – sitting; All 3x10-15reps (resistance band)</li> <li>• Balancing 1 foot on Airex® pad 3x45-60seconds</li> </ul>                                                                                                                                                                                                                                                                                                                                                                                                                                           | <p>3x30seconds</p> <p>Week 5-6</p> <ul style="list-style-type: none"> <li>• Double-legged wall squat (to max 90° knee flexion); 3x45-60seconds;</li> <li>• Lateral step-down (6–10 in [5.6–9.6 cm] step); Forward step-down (6–10 in [5.6–9.6 cm] step) ; Forward one-half full lunge (to maximum 90° of knee flexion); Single-legged one-half full squat (to maximum 90° of knee flexion); 3x15 repetitions</li> </ul>                                                                                                                                                                                                                                 |                                                                                                                                                                                                                                                                                        |         |
| Dolak et al. <sup>24</sup> | <p>4 weeks initial proximal abduction and external rotation rehabilitation followed by 4 weeks weight bearing exercises (n=17)</p> <ul style="list-style-type: none"> <li>• Exercise completed 3xper week (1 supervised, 2 at home)</li> <li>• Seated hamstring stretch, standing quadriceps stretch and standing wall stretch for triceps surae for 3x30sec prior to rehabilitation</li> <li>• Progression made on an individual basis by the treating clinician within protocol limits</li> <li>• Side-lying proximal abduction/external rotation +/- 3-7% of body weight 3x10repetitions</li> <li>• Standing proximal abduction +/- 3-7% body weight 3x10repetitions</li> <li>• Seated proximal external</li> </ul> | <p>4 weeks initial quadriceps rehabilitation followed by 4 weeks weight bearing exercises (n=16)</p> <ul style="list-style-type: none"> <li>• Exercise completed 3xper week (1 supervised, 2 at home)</li> <li>• Seated hamstring stretch, standing quadriceps stretch and standing wall stretch for triceps surae for 3x30sec prior to rehabilitation</li> <li>• Progression made on an individual basis by the treating clinician within protocol limits</li> <li>• Quad sets</li> <li>• Short arc quads +/- 3-7% body weight</li> <li>• Straight leg raises +/- 3-7% body weight</li> <li>• Terminal knee extension with 3-7% body weight</li> </ul> | <ul style="list-style-type: none"> <li>• Pain</li> <li>• VAS</li> <li>• Function</li> <li>• LEFS</li> <li>• Strength</li> <li>• Isometric proximal abduction strength</li> <li>• Isometric proximal external rotation strength</li> <li>• Isometric knee extension strength</li> </ul> | 4 Weeks |

|                                       |                                                                                                                                                                                                                                                                                                                                                                                                                                                                                                                                                        |                                                                                                                                                                                                                                                                                                                                                                                                                                                                                                                                                                                                                                                                                                                                       |                                                                                                                                                                                                                                                                                                                                                                                                               |                      |
|---------------------------------------|--------------------------------------------------------------------------------------------------------------------------------------------------------------------------------------------------------------------------------------------------------------------------------------------------------------------------------------------------------------------------------------------------------------------------------------------------------------------------------------------------------------------------------------------------------|---------------------------------------------------------------------------------------------------------------------------------------------------------------------------------------------------------------------------------------------------------------------------------------------------------------------------------------------------------------------------------------------------------------------------------------------------------------------------------------------------------------------------------------------------------------------------------------------------------------------------------------------------------------------------------------------------------------------------------------|---------------------------------------------------------------------------------------------------------------------------------------------------------------------------------------------------------------------------------------------------------------------------------------------------------------------------------------------------------------------------------------------------------------|----------------------|
|                                       | <p>rotation +/- 3-7% body weight<br/>3x10repetitions</p> <ul style="list-style-type: none"> <li>• Quadruped hydrant +/-3% body weight 3x10repetitions</li> </ul>                                                                                                                                                                                                                                                                                                                                                                                       |                                                                                                                                                                                                                                                                                                                                                                                                                                                                                                                                                                                                                                                                                                                                       |                                                                                                                                                                                                                                                                                                                                                                                                               |                      |
| Khayambashi et al. <a href="#">43</a> | <p>8 weeks posterolateral proximal rehabilitation exercises</p> <ul style="list-style-type: none"> <li>• Exercise completed 3 times per week, supervised by a therapist</li> <li>• 5 min walking warm up</li> <li>• 20 mins resistance banding exercises for proximal abduction and external rotation – 3 sets of 20-25 reps using progressively increasing resistance banding</li> <li>• 5 min walking cool down</li> </ul>                                                                                                                           | <p>8 weeks quadriceps rehabilitation exercises</p> <ul style="list-style-type: none"> <li>• Exercise completed 3 times per week, supervised by a therapist</li> <li>• 5 min walking warm up</li> <li>• 20 mins resistance banding exercises – seated knee extension against resistance banding, and squatting - 3 sets of 20-25 reps using progressively increasing resistance banding</li> <li>• 5 in walking cool down</li> </ul>                                                                                                                                                                                                                                                                                                   | <ul style="list-style-type: none"> <li>• Pain <ul style="list-style-type: none"> <li>• VAS</li> </ul> </li> <li>• Function <ul style="list-style-type: none"> <li>• WOMAC</li> </ul> </li> </ul>                                                                                                                                                                                                              | 8 weeks and 6 months |
| Baldon et al. <a href="#">44</a>      | <p>8 weeks functional stabilisation exercises directed at the proximal and trunk</p> <ul style="list-style-type: none"> <li>• Exercises performed 3 times per week supervised</li> <li>• First 2 weeks – exercises focused at enhancing motor control at trunk and proximal – 20% of 1 repetition maximum – 2x20repetitions</li> <li>• Next 3 weeks – exercises to increase proximal strength and maintain motor control – 75% of 1 repetition maximum – 3x12 repetitions</li> <li>• Final 3 weeks – intensity increased whilst maintaining</li> </ul> | <p>8 week standard training programme focused on quadriceps rehabilitation</p> <ul style="list-style-type: none"> <li>• Exercises performed 3 times per week supervised</li> <li>• Comprised of combination of stretches, open and closed kinetic chain exercises</li> <li>• Included straight leg raise, knee extension, leg press, wall squats, step ups, single leg standing on unstable platform</li> <li>• First 2 weeks – exercises focused at enhancing motor – 20% of 1 repetition maximum – 2x20repetitions</li> <li>• Next 3 weeks – exercises to increase quadriceps strength and maintain motor control – 75% of 1 repetition maximum – 3x12 repetitions</li> <li>• Final 3 weeks – intensity increased whilst</li> </ul> | <ul style="list-style-type: none"> <li>• Pain <ul style="list-style-type: none"> <li>• VAS</li> </ul> </li> <li>• Function <ul style="list-style-type: none"> <li>• LEFS</li> <li>• Single leg triple hop</li> </ul> </li> <li>• Single leg squat kinematics <ul style="list-style-type: none"> <li>• Trunk, pelvis, proximal and knee</li> </ul> </li> <li>• Trunk endurance and eccentric torque</li> </ul> | 8 weeks and 3 months |

|                                                           |                                                                                                                                                                                                                              |                                                                                                                                                                                                                                          |  |  |
|-----------------------------------------------------------|------------------------------------------------------------------------------------------------------------------------------------------------------------------------------------------------------------------------------|------------------------------------------------------------------------------------------------------------------------------------------------------------------------------------------------------------------------------------------|--|--|
|                                                           | <p>good lower limb alignment - 75% of 1 repetition maximum</p> <ul style="list-style-type: none"> <li>• 1 repetition maximum assessed at 3 and 6 weeks</li> <li>• All exercises performed within 3/10 pain limits</li> </ul> | <p>maintaining good lower limb alignment - 75% of 1 repetition maximum</p> <ul style="list-style-type: none"> <li>• 1 repetition maximum assessed at 3 and 6 weeks</li> <li>• All exercises performed within 3/10 pain limits</li> </ul> |  |  |
| WOMAC = Western Ontario and McMaster osteoarthritis index |                                                                                                                                                                                                                              |                                                                                                                                                                                                                                          |  |  |
