# Supplementary material for: Proximal muscle rehabilitation is effective for patellofemoral pain: a systematic review with meta-analysis
Source: HighWire-hosted journal article supplement (doi:10.1136/bjsports-2015-094723), 2015-07-14
Supplement: bjsports-2015-094723supp5.pdf [file bjsports-2015-094723supp5.pdf]

Supplementary File 5 – Proximal rehabilitation alone study characteristics

| <i>Author</i>                        | <i>Intervention</i>                                                                                                                                                                                                                                                                                                                                                                                                                                                                                                                                                                                                                                                                                                                   | <i>Control</i> | <i>Variables measured</i>                                                                                                                                                                                                                                                                                                                                                                                                                                                                                                                                                                                                                                                      | <i>Follow up</i> |
|--------------------------------------|---------------------------------------------------------------------------------------------------------------------------------------------------------------------------------------------------------------------------------------------------------------------------------------------------------------------------------------------------------------------------------------------------------------------------------------------------------------------------------------------------------------------------------------------------------------------------------------------------------------------------------------------------------------------------------------------------------------------------------------|----------------|--------------------------------------------------------------------------------------------------------------------------------------------------------------------------------------------------------------------------------------------------------------------------------------------------------------------------------------------------------------------------------------------------------------------------------------------------------------------------------------------------------------------------------------------------------------------------------------------------------------------------------------------------------------------------------|------------------|
| <b>Proximal rehabilitation alone</b> |                                                                                                                                                                                                                                                                                                                                                                                                                                                                                                                                                                                                                                                                                                                                       |                |                                                                                                                                                                                                                                                                                                                                                                                                                                                                                                                                                                                                                                                                                |                  |
| Earl & Hoch<br><a href="#">25</a>    | Proximal & core muscle rehabilitation programme (n=19) <ul style="list-style-type: none"> <li>• 8-15 supervised sessions lasting 30-60minutes over 8 weeks</li> <li>• Additional 3xper home exercise programme</li> <li>• Hamstring, Quadriceps and calf stretches</li> <li>• Abdominal draw in</li> <li>• Side lying clamshell</li> <li>• Side lying straight leg raising</li> <li>• Supine arm/leg extension</li> <li>• Quadruped arm/leg extension</li> <li>• Isometric single leg stance +/- proximal abduction/quick kicks</li> <li>• Single leg column weights</li> <li>• Prone and side plank</li> <li>• Monster walks</li> <li>• Mini squats</li> <li>• Single leg stance with sport specific upper limb movements</li> </ul> | None           | <ul style="list-style-type: none"> <li>• Pain               <ul style="list-style-type: none"> <li>• VAS</li> <li>• AKPS</li> </ul> </li> <li>• Strength               <ul style="list-style-type: none"> <li>• Isometric proximal abduction strength</li> <li>• Isometric proximal external rotation strength</li> <li>• Anterior, lateral and posterior core endurance</li> </ul> </li> <li>• Kinematics               <ol style="list-style-type: none"> <li>1. Peak internal joint moments during the stance phase of running</li> </ol> </li> <li>• Clinical measures               <ul style="list-style-type: none"> <li>• Joint range of motion</li> </ul> </li> </ul> | 8 weeks          |

|                                                                     |                                                                                                                                                                                                                                                                                                                                                                                                                                                                                                                                                                                                                |             |                                                                                                                                                                                                                                                                                                                                                                                                                                                                                  |                |
|---------------------------------------------------------------------|----------------------------------------------------------------------------------------------------------------------------------------------------------------------------------------------------------------------------------------------------------------------------------------------------------------------------------------------------------------------------------------------------------------------------------------------------------------------------------------------------------------------------------------------------------------------------------------------------------------|-------------|----------------------------------------------------------------------------------------------------------------------------------------------------------------------------------------------------------------------------------------------------------------------------------------------------------------------------------------------------------------------------------------------------------------------------------------------------------------------------------|----------------|
| <p>Tyler et al.<br/><a href="#">25</a></p>                          | <p>Proximal rehabilitation and flexibility programme (n=35, 43 Knees)</p> <ul style="list-style-type: none"> <li>• Home exercise programme performed daily</li> <li>• Progressive resisted exercise - Seated proximal flexion, adduction, extension, abduction</li> <li>• Stretching proximal flexors, quadriceps, iliotibial band</li> <li>• Manual therapy – patella mobs</li> <li>• Mini squats</li> <li>• Balance exercise</li> <li>• Step ups and step downs</li> <li>• Upper and lower extremity reaches</li> <li>• Plyometric/agility exercises</li> <li>• Lunges</li> <li>• Return to sport</li> </ul> | <p>None</p> | <ul style="list-style-type: none"> <li>• Pain <ul style="list-style-type: none"> <li>• During activities of daily living VAS</li> <li>• Exercise VAS</li> </ul> </li> <li>• Strength <ul style="list-style-type: none"> <li>• Proximal flexion strength</li> <li>• Proximal abduction strength</li> <li>• Proximal adduction strength</li> </ul> </li> <li>• Clinical Measures <ul style="list-style-type: none"> <li>• Obers test</li> <li>• Thomas test</li> </ul> </li> </ul> | <p>6 weeks</p> |
| <p>VAS – Visual analogue scale; AKPS – Anterior knee pain score</p> |                                                                                                                                                                                                                                                                                                                                                                                                                                                                                                                                                                                                                |             |                                                                                                                                                                                                                                                                                                                                                                                                                                                                                  |                |
